# Supplementary material
Source: Elsevier journal article supplement (https://www.sciencedirect.com/science/article/pii/S2666506920300523)
Supplement: mmc1 [file S2666506920300523:mmc1.doc]

¿ALTO RATIO ENTRENAMIENTO/COMPETENCIA, MENOR INCIDENCIA DE LESIONES?

*Exploración sobre calendarios de futbol profesional.*

HIGH TRAINING / COMPETITION RATIO, LESS INCIDENCE OF INJURY?

*Professional football calendars exploration.*

**Resumen**

**Objetivos:** Se teoriza que un alto ratio entrenamiento/competencia, predispone a menos lesiones en los futbolistas profesionales. Esto no ha sido estudiado en jugadores profesionales de elite.

El objetivo de este trabajo fue investigar la incidencia de lesiones en jugadores profesionales que tuvieron una frecuencia de una competencia por semana durante doce temporadas. Se destaca los ciclos de recuperación-entrenamiento de cinco a ocho días entre competencias.

**Método**: La presente investigación es un análisis de datos registrados prospectivamente sobre las lesiones en un equipo de fútbol profesional Argentino, durante doce temporadas.

Se registró diariamente información sobre la lesiones.

**Resultados:** El equipo evaluado tuvo una frecuencia de 3.85 competencias por mes, y el ratio fue 8.4 horas de entrenamiento para cada hora de partido, durante los doce años que duro el estudio. La tasa de incidencia de lesión obtenida en la presente investigación fue de 4.2 cada 1000 horas de entrenamiento y competición.

La tasa de incidencia de lesiones en las sesiones de entrenamiento fue de 2.3 lesiones por cada 1,000 horas de entrenamiento. La tasa de incidencia de lesiones en las competencias fue de 20.5 lesiones por cada 1,000 horas de competencia.

En el 65% de todas las lesiones los jugadores retornaron a la competencia (RTP) antes de siete días, con tratamiento médico-kinésico adaptado a cada deportista.

Se presentan tablas de comparación con Fútbol Europeo.

**Conclusiones:** Los calendarios deportivos con un alto ratio entrenamiento/competencia y con un periodo de recuperación/entrenamiento de 5 a 8 días entre competencias, podrían incidir en una disminución de las lesiones que exijan mayor tiempo de RTP y en provocar una tasa de incidencia de lesión relativamente baja en futbolistas profesionales.

***Palabras claves*: Fútbol.**Lesiones fútbol. Prevención de lesiones. Incidencia de lesiones. Calendarios deportivos.

**Summary**

**Objectives:** It is inferred that a high training/competition ratio predisposes to less injuries in professional soccer players. This has not been studied in professional elite players.

The objective of this work was to investigate the incidence of injuries in professional players who had a frequency of one competition per week for twelve seasons. Recovery-training periods of five to eight days between competitions are highlighted.

**Method:** This research is an analysis of prospectively recorded data on injuries in an Argentine professional soccer team, during the twelve evaluated seasons.

Information about the injury was recorded daily.

**Results:** The evaluated team had a frequency of 3.85 competitions per month, and the ratio was 8.4 hours of training for each game hour, during the twelve years that the study lasted. The injury incidence rate obtained in the present investigation was 4.2 per 1000 hours of training and competition.

The injury incidence rate in training sessions was 2.3 injuries per 1,000 hours of training. The incidence rate of injuries in competitions was 20.5 injuries per 1,000 hours.

65% of all injuries, players returned to competition (RTP) within seven days, with medical-kinesic treatment adapted to each athlete.

Comparison tables with European Football are presented.

**Conclusions:** Sports calendars with a high training / competition ratio and a recovery/ training period of 5 to 8 days between competitions, could have an impact in reducing injuries that require a longer RTP time and in causing a relatively low injury incidence rate in professional soccer players .

*Key words:* Football. Football injuries. Injury prevention. Incidence of injuries. Sports calendars.

**Introducción**

Existe una vinculación entre los calendarios deportivos y las lesiones. La relación entre entrenamientos y competencias supone que un alto ratio entrenamiento/competencia, predispone a menos lesiones1. Esto no ha sido estudiado en jugadores de futbol de elite2. El presente estudio pretendió investigar esta correlación entre la exposición de futbolistas profesionales a la frecuencia de una competencia por semana, con ciclos regulares, de 5 a 8 días, de recuperación-entrenamiento entre competencias y su incidencia de lesiones.

Esta investigación presenta el análisis de todas las lesiones registradas durante doce años en un equipo de fútbol Profesional de Primera, Club Defensa y Justicia, en el “Torneo Nacional B”, de la Asociación de Fútbol Argentino (AFA).

El análisis estadístico al final de cada temporada, proporciona datos epidemiológicos que en general son utilizados para comparar con temporadas anteriores, con otros equipos y con datos bibliográficos; esto tiene como objetivo evaluar la temporada y brindar herramientas, fundamentalmente, de prevención de lesiones3,4,5,6. La UEFA (Unión de Asociaciones Europeas de Fútbol) ha expresado su preocupación por las demandas a los futbolistas modernos y la traducción de estas demandas físicas y mentales en síndromes de lesiones2. La carga absoluta de actividad física acumulada, en horas, que soporta el futbolista profesional es menor entre aquellos que juegan un solo campeonato y los que participan en dos o más campeonatos.

Este estudio muestra la incidencia de lesiones y sus características en un equipo de Fútbol Profesional Sudamericano que participa en un solo Torneo, de 38 fechas. La frecuencia mensual fue de 3,85 partidos, esta fue baja en relación a otros equipos Europeos que deben cumplir con la participación en dos o más torneos de forma simultánea, donde generalmente participan en 6 partidos por mes7.

En el fútbol de élite, algunos jugadores pueden jugar hasta 70 competencias por temporada. Ante esta frecuencia se requiere que los jugadores jueguen partidos consecutivos entremezclados cada 3 días y sin lograr la recuperación completa del rendimiento físico. Cuando la carga de trabajo excede la capacidad del deportista, lo lleva a una fatiga excesiva y un mayor riesgo de lesión8.

Sería conveniente la búsqueda de la cantidad de competencias y entrenamientos adecuados en relación al cronograma anual. Este trabajo propone evidenciar la valoración de la organización de calendarios deportivos y controlar e investigar las temporadas deportivas en el futbol profesional, con un fin preventivo.

**Métodos**

El autor del presente trabajo es médico responsable del equipo de fútbol profesional, Club Defensa y Justicia base de esta investigación. Las temporadas evaluadas (2003 al 2012 inclusive) corresponden a doce temporadas en que el equipo participó en el torneo Nacional B de la Asociación de Fútbol Argentino (AFA). (El equipo también, en este periodo, disputo 7 competencias de otro torneo, Copa Argentina)

El mencionado profesional fue el encargado de la evaluación clínica, el diagnóstico y el tratamiento del equipo investigado, tarea llevada a cabo junto a kinesiólogos del Club, y a médicos especialistas en imágenes externos al mismo.

Se registró información sobre la lesión, incluido el tipo, la gravedad, el sitio de la misma, el tiempo de evolución, el mecanismo de la lesión y si sucedió durante un partido o un entrenamiento.

Esta investigación es un análisis de los datos epidemiológicos registrados prospectivamente en jugadores profesionales; realizado con un riguroso registro médico diario.

Los datos se recopilaron desde el inicio de la pretemporada del equipo hasta la semana

del último entrenamiento, que generalmente coincide con el ultimo partido competitivo de del campeonato.

Se consideró como definición de lesión la descripta por J. Dvorak y A. Junge del año 2000 del A.J.S.M., que define a la lesión como aquella ocurrida durante la práctica deportiva y que le provocó al deportista la ausencia a entrenamiento/s y partido/s, seguida por la necesidad de un diagnóstico anatómico del tejido dañado y el tratamiento correspondiente.3,4,5,8,9.

En el presente trabajo no se registró como lesión a la ausencia de entrenamiento por enfermedad, ya que, a diferencia de otros trabajos, la no inclusión de las mismas podría mostrar mayor especificidad en relación a la epidemiología del fútbol.

Para la gravedad de la lesión se utilizó el concepto de Centro de Investigaciones Médicas de la FIFA, definida como “la longitud de tiempo desde que un jugador ha incurrido en una lesión hasta el día que retorne para una completa participación a los entrenamientos y disponibilidad plena para la competición”3,6,10,12.

Se tomó el tiempo de recuperación de cada lesión hasta el retorno a la práctica de fútbol, la gravedad de la lesión se determinó por el número de días de ausencia en los entrenamientos4,10. La UEFA (Unión of European Football Associations) sugiere la clasificación: leve (1 a 3 días), menor (4 a 7 días), moderada (8 a 28 días) y mayores (más de 28 días)4,12. Pero para el presente trabajo se utilizó la clasificación de la gravedad de lesiones descripta por el Dr. Vicente Paus 13 que es una modificación de la clasificación de Dvorak y Junge,5 basándose en el tiempo de recuperación demandado para el retorno a la actividad deportiva11.12, Grado I (leves): de 1 a 7 días; Grado II (moderadas): de 1 a 3 semanas; Grado III (graves): de 3 a 8 semanas: Grado IV (severas): de más de 8 semanas.

El principal resultado de la investigación epidemiológica de lesiones deportivas es la incidencia de lesiones y por lo general se expresa como una proporción entre numerador y denominador. En el numerador se tienen en cuenta los casos (número de lesiones) durante un período de tiempo definido y en el denominador el número total de deportistas expuestos (atletas en situación de riesgo)9. En los deportes de equipo, la incidencia de lesión es generalmente expresada en número de lesiones por cada 1.000 horas de participación4,8,12,14.

En muchos deportes, la exposición durante la competición es fácil de registrar. Sin embargo registrar con precisión la exposición a cargas de entrenamiento en el fútbol puede ser difícil 10.El tiempo total de cada entrenamiento fue muy variable. Se consideró el tiempo de entrenamiento desde el inicio de la entrada en calor hasta el trabajo de elongación final, sin utilización de GPS. En el fútbol, la exposición en el entrenamiento se define como las distintas actividades físicas individuales y basadas en el equipo, bajo el control u orientación del personal de entrenamiento, o entrenamiento del equipo que tienen como objetivo mantener o mejorar las habilidades futbolísticas o la condición física de los jugadores10.

En esta investigación se consideró, en concordancia con estudios realizados recientemente, la tasa de incidencia de lesiones diferenciadas para entrenamientos o partidos.1,4,10,11,16.

Los equipos fútbol evaluados en los doce años estuvieron conformados por un promedio de 28 jugadores profesionales por temporada. El rango etario fue de 17 a 38 años, con una edad promedio de 26 años.

Todos los procedimientos experimentales fueron diseñados de acuerdo con la Conferencia de Helsinki para la investigación en seres humanos y los estándares éticos en la investigación científica en deportes y ejercicio.

**Resultados**

El equipo evaluado tuvo una frecuencia de 3.85 partidos por mes. Durante los doce años que duro el estudio, fueron observadas 4.710 horas de entrenamientos y 715 horas de competencias. El ratio entrenamientos/competencia fue de 8.4, horas de entrenamiento para cada hora de partido. Dicha Frecuencia mensual y anual de partidos se podía considerar baja en comparación a otros equipos del fútbol Europeo, que participan en el campeonato local y en copas internacionales.

En estos 12 años de seguimiento, los jugadores realizaron 8317 consultas médicas en el marco de 3364 sesiones de entrenamiento y 461 competencias, se diagnosticaron 797 lesiones.

En estas doce temporadas la desviación estándar del estudio fue de 6,31; la mediana 68,5; el menor número de lesiones en una temporada fue de 53 y el mayor número de lesiones en una temporada fue de 73, siendo el rango de las doce temporadas estudiadas de 20.

La información obtenida en la presente investigación muestra que la tasa de incidencia de lesión fue de 4.2 lesiones por cada 1000 horas (entrenamiento y competición).

La tasa de incidencia de lesiones en las sesiones de entrenamiento fue de 2.3 lesiones por cada 1,000 horas de entrenamiento. La tasa de incidencia de lesiones en los partidos fue de 20.5 lesiones por cada 1,000 horas de competencia.

El promedio de ausencia por lesión fue de 21,4 horas. La carga de lesión (injury burden) fue de 90 días por cada 1000 horas (entrenamiento y competencia).

Se describió que la lesión más frecuente fue la Muscular (44.54%)10,15,16. La lesión en articulación de Rodilla (17.3 %,) y en el Tobillo (16%). (Gráfico l).

La mayoría de los tratamientos utilizados fueron incruentos (rehabilitación), siendo que un porcentaje mínimo el de las lesiones requirieron tratamiento quirúrgico (1.24%).

El porcentaje de las lesiones por contacto indirecto fueron el 57.1% y por contacto directo fueron 42.9%.

Las 797 lesiones diagnosticadas fueron clasificadas de acuerdo al tiempo de evolución: como lesiones Grado 1: 65%, lesiones Grado 2: 20,82 %, lesiones Grado 3: 8,53% y lesiones Grado 4: 6,02%. (Gráfico ll)

Como dato relevante se destaca que en el 65 % de todas las lesiones diagnosticadas, los jugadores retornaron a la competencia (RTP) antes de siete días con tratamiento médico-kinésico adaptado a cada deportista.- Estas comprenden en la clasificación de gravedad de la UEFA, a leves (1 a 3 días) y menores (4 a 7 días)-.

Se observó que de las 797 lesiones diagnosticadas 355 correspondían a lesiones musculares. En esta línea se comprobó que la lesión muscular Grado 0,  dolor muscular sin lesión anatómica DOMS o con daño muscular microscópico (es decir, por debajo de la sensibilidad de la RMI)18,19,20,21,22. fue la lesión más frecuente (23.84% del total de lesiones) y los jugadores que padecieron estas lesiones musculares entrenaron en forma diferenciada por menos de una semana.

Dentro de las lesiones musculares, el grupo más afectado fue el posterior muslo23 (Isquiotibiales) representado el 53.46% de las lesiones musculares.

*Datos analizados y presentados en esta investigación se comparan con estudios del Fútbol Europeo y se presentan en las tablas correspondientes.*

**Discusión**

El objetivo de esta investigación fue analizar la correlación entre la exposición de futbolistas profesionales a la frecuencia de una competencia por semana, con periodos regulares de 5 a 8 días, de recuperación-entrenamiento entre competencia y su incidencia en las lesiones.

El tiempo total de cada entrenamiento fue muy variable. Se consideró el tiempo de entrenamiento, desde el inicio de la entrada en calor hasta el trabajo de elongación final.

El control del tiempo del entrenamiento, podría ser más preciso si utilizamos GPS.

También podría el GPS otorgar otros datos significativos como volumen de trabajo en kilómetros totales, e intensidades de trabajo.

En nuestro club la epidemiologia de cada temporada, la informamos en el departamento Medico y en el Cuerpo Técnico. A partir de estos datos planificamos trabajos de prevención, que se realizan constantemente. Pero utilizar un protocolo estable es difícil, por el cambio continúo de Cuerpos Técnicos.

Los datos hallados en un período de doce temporadas en un equipo de fútbol profesional podrían aportar datos reales para planificar calendarios deportivos y también poder comparar con otras regiones más estudiadas.

En la presente investigación el ratio fue de 8.4 horas de entrenamiento para cada hora de competencia. En el reporte de la UEFA 2016/17, el ratio fue de 6.3 horas de entrenamiento para cada hora de competencia. Esto podría suponer una diferencia de 2.1 horas más de entrenamiento por hora de competencia en campeonato desarrollados con una fecha por semana ante campeonatos que tengan períodos de dos fechas en una semana. Este mayor número de entrenamientos, produciría una **ganancia del efecto protector que los mismos ejercen sobre las lesiones**. Entonces, el ratio alto entrenamiento/competencia debería mejorar la condición física de los jugadores, proteger contra lesiones, y generar resistencia en la competencia25.

En la Liga de Campeones UEFA,16 Walden y colaboradores han analizado niveles de incidencia de lesión durante el torneo. El riesgo de lesión en competencia ha sido significativamente mayor en la Liga de Campeones UEFA en comparación con los datos obtenidos en el presente estudio, 30.5 vs. 20.5 lesiones por cada 1000 horas de competencia, y también mayor la diferencia con respecto a las lesiones en entrenamiento 5.8 vs 2.3 por cada 1000 horas de entrenamiento.

En el informe de la Asociación de Fútbol Inglés (FA) “Vigilancia de Lesiones del Campeonato de la Asociación de Fútbol 2013-2016”, la incidencia de lesiones por competencia y entrenamiento también fueron superiores a datos hallados en el presente estudio, 23.8 vs 20.5 lesiones por cada 1000 horas de competencias y también superior la incidencia de lesiones de entrenamiento 4 vs 2.3 lesiones por cada 1000 horas de entrenamientos.

En este estudio se encontró, en relación a la gravedad de las lesiones, una alta proporción, 65%, de las lesiones con retornos del jugador a la competencia (RTP) antes de los 7 días. Esta proporción estuvo por encima de lo reportado en otros estudios del Fútbol Europeo1,3,5,16,17,23,24 En el reporte del estudio de Lesiones del Club Elite de la UEFA 2016/17el RTP antes de los 7 días fue de 27.1%. Mientras que en el análisis de 16 años del Estudio de Lesiones del Club Elite de la UEFA, el RTP antes de los 7 días fue del 42%.24

Por lo tanto podemos expresar que en este estudio la mayoría de las ausencias por lesiones se atribuyeron a diagnósticos de lesiones leves.  La combinación de la frecuencia y la gravedad de la lesión, es decir, la carga de la lesión, (injury burden), probablemente es una herramienta clínicamente a considerar para describir el impacto de las lesiones en los equipos de fútbol profesional26. En el presente estudio la carga de lesión fue de 90 días por cada 1000 horas (entrenamiento y competencia). En el estudio de Hagglund y Ekstrand, de la UEFA Champions League, de 11 años, la carga de lesión fue superior al presente estudio, 130 días /1000 horas.28

También se observó que la tasa de incidencia de lesión (4.2 por cada 1000 horas) fue baja en comparación con otros estudios del Fútbol Europeo1,4,15,16

Estos datos observados tendrían relación con que los doce años del estudio coincidieron con temporadas regulares de 38 partidos oficiales, con períodos de recuperación-entrenamiento de 5 a 8 días entre competencias, con dos ciclos anuales de competencia, dos períodos preparatorios y dos períodos de transición; a diferencia de lo que sucede en la mayoría del fútbol Europeo que abarcan un promedio de 60 partidos con un período de competencia, un período preparatorio y un período de transición.

La organización del sistema competitivo transformaría a los ciclos de recuperación-entrenamiento entre competencias en un componente relevante a la hora de analizar la tasa de incidencia de lesiones durante un Torneo.

Este estudio mostraría que la regularidad de los partidos oficiales con un período de recuperación de 5 a 8 días entre partidos y un ratio adecuado entrenamiento-competencia, podría incidir en una menor proporción de lesiones que exijan mayor tiempo de recuperación, y en una tasa de incidencia de lesión relativamente baja 16,26.

Se considera a la aplicación de protocolos para la prevención de lesiones en el alto rendimiento, como fundamental3,5,10,27 y este trabajo podría evidenciar que dentro de estos protocolos un ratio de 8,4 entrenamiento/competencia podría ser un factor preventivo de lesiones en el fútbol profesional. Sería conveniente en investigaciones futuras la búsqueda de la cantidad de competencias y entrenamientos adecuados en relación al cronograma anual.

Los datos de esta investigación proporcionan información útil para poder trabajar de manera proactiva en la elaboración y planificación de calendarios deportivos en relación a la prevención de lesiones.

**Referencias**

1. Bengtsson H, Ekstrand J, Hägglund M. Muscle injury rates in professional football increase with fixture congestion: an 11 year follow up of the UEFA Champions League injury study. Br J Sports Med 2013; 47(12):743-747. 2. Ekstrand J, Waldén M, Hägglund M. A congested football calendar and the wellbeing of players: correlation between match exposure of European footballers before the World Cup 2002 and their injuries and performances during that World Cup. *British Journal of Sports Medicine*, 2004;38(4):493-497.

3. Fuller CW, Ekstrand J, Junge A, Andersen TE, Bahr R, Dvorak J, et al. Consensus statement on injury definitions and data collection procedures in soccer (soccer) injury studies. *Br J Sports Med*. 2006;40:193-201.

4. Belloch LL, Figueres LL, Perz Soriano. La epidemiología del fútbol: una revisión sistemática. *Revista internacional Medicina y Ciencias Afines al deporte* 2010;10(37): 22-40.

5. Dvorak J, Junge A, Grimm K, Kirkendall D. Medical report from the 2006 FIFA World Cup Germany. *British Journal of Sports Medicine*. 2007;41:578–581.

6. Cajón S, Fuller CW. Assessing the level of injuries in English professional football through a risk-based assessment process. Br J Sports. 2002;36:446-451.

7. Ekstrand J, Hägglund M, Waldén M. Injury incidence and injury patterns in professional football: the UEFA injury study. Br J Sports Med. 2011;45(7):553–558.

8. Gabbett T J. The training—injury prevention paradox: should athletes be training smarter and harder? *British Journal of Sports Medicine*. 2016;50(5): 273-280.

9. Hagglund M, Walden M, Bahr R, Ekstrand j. Methods for the epidemiological study of injuries in professional soccer players: development of the UEFA model, model. *Br J Sports Med* . 2005;39:340-346.

10. Francesc Cosa, Miquel Angel Cosb, Lorenzo Buenaventurac, Ricard Prunad y Jan Ekstrand Modelos de análisis para la prevención de lesiones en el deporte. Estudio epidemiológico de lesiones: el modelo Unión of European Football Associations en el futbol, *Apunts medicina de lésport*. 2010;45:95-102.

11. Dvorak J, Junge A, Chomiak J, MD, Graf Baunmann T, Peterson, L, Rossch D, Hodgsonb, R. Risk Factor Anallysis for Injuries in Football Player. *AJSM* 2000; 28:40 – 46.

12. Fuller C, Junge A, Dvorak J. A six year prospective study of the incidence and causes of head and neck injuries in international football. *Br. J. Sports Med*. 2005; 39: 3-9.

13. Paús V, Torrengo F. Incidencia de Lesiones en Jugadores de Fútbol Profesional. *Revista Asociación Argentina de Traumatología del Deporte,* 2006; 10(1)10-17.

14. Hägglund M, Waldén M, Ekstrand J. Previous injury as a risk factor for injury in elite football: a prospective study over two consecutive seasons. *Br. J. Sports Med.* 2006;40(9):767-772.

15. Junge A, Chomiak J, Dvorak J. Incidence of football injuries in youth players. Comparison of players from two European regions. *Am J Sports Med*. 2000; 28(5): 47‐50.

16. Waldén M, Hägglund M, Ekstrand J. UEFA Champions League Study: A Prospective Study of Injuries in Professional Football during the 2001-2002 Season. *British Journal of Sports Medicine* 2005; 39(8):542-546.

17. Hägglund M, Waldén M, Ekstrand J. Risk factors for lower extremity muscle injury in professional soccer: the UEFA Injury Study. *Am J Sports Med*. 2013;41(2):327‐335. 18. Ekstrand J, Healy JC, Walden M, Lee J, English B, Hagglund M. Hamstring. Br J Muscle injuries in professional football: the correlation of MRI findings with return to play. *Sports Med.* 2012;46:112-117

19. Valle X, Alentorn-Geli E, Tol JL. et al. Muscle Injuries in Sports: A New Evidence-Informed and Expert Consensus-Based Classification with Clinical Application. Sports Med 2017;47,1241–1253.

20. Evans GF, Haller RG, Wyrick PS, Parkey RW, Fleckenstein JL Submaximal late-onset muscle pain: correlations between MRI findings and clinical measures. *Radiology*. 1998;208:815–820.

21. Pollock N, James SL, Lee JC, Chakraverty R. Br J British Classification of Athletic Muscle Injuries: A New Classification System. *Sports Med*. 2014; 48:1347-1351.

22. Verrall GM, Slavotinek JP, Barnes PG, Fon GT. Diagnostic and prognostic value of clinical findings in 83 athletes with posterior thigh injury: comparison of clinical findings with MRI documentation of hamstring muscle tension. *Am J Sports Med.* 2003; 31:969–973.

23. Krutsch W, Eder K, Krutsch V, et al.  "Stay and play" in football: Art of keeping players fit to play. *Unfallchirurg*. 2018;121:433–440.

24. Ekstrand J, Krutsch W, Spreco A, et al. Time before return to play for the most common injuries in professional football: a 16-year follow-up of the UEFA Elite Club Injury Study. *Br J Sports Med*. 2020; 54(7):421‐426.

25. Stevens TGA, de Ruiter CJ, Twisk JWR, Savelsbergh GJP, Beek PJ. Quantification of in-season training load relative to match load in professional Dutch. Eredivisie football players*. Sci. Med*. *Footb*. 2017;2:117-125.

26. Bahr R, Clarsen B, Ekstrand J. Why should we focus on the burden of injuries and illnesses, not just their incidence? *Br J Sports Med* 2018;52:1018–1021.

27. McCall A, Dupont G, Ekstrand J. Injury prevention strategies, coach compliance and player adherence of 3 of the UEFA Elite Club Injury Study teams: a survey of teams’ *British Journal of Sports Medicine*2016; 50:725-730.

28. Hägglund M, Waldén M, Magnusson H, Kristenson K, Bengtsson H, Ekstrand J. Injuries affect team performance negatively in professional football: an 11-year follow-up of the UEFA Champions League injury study. *Br J Sports Med*. 2013; 47(12):738-742.

**Tablas y Figuras**
